# Supplementary material for: Cryptococcus extracellular vesicles properties and their use as vaccine platforms
Source: PubMed Central journal article supplement (PMC8329992; doi:10.1002/jev2.12129), 2021-08-02
Supplement: JEV2-10-e12129-s005.pdf [file JEV2-10-e12129-s005.pdf]

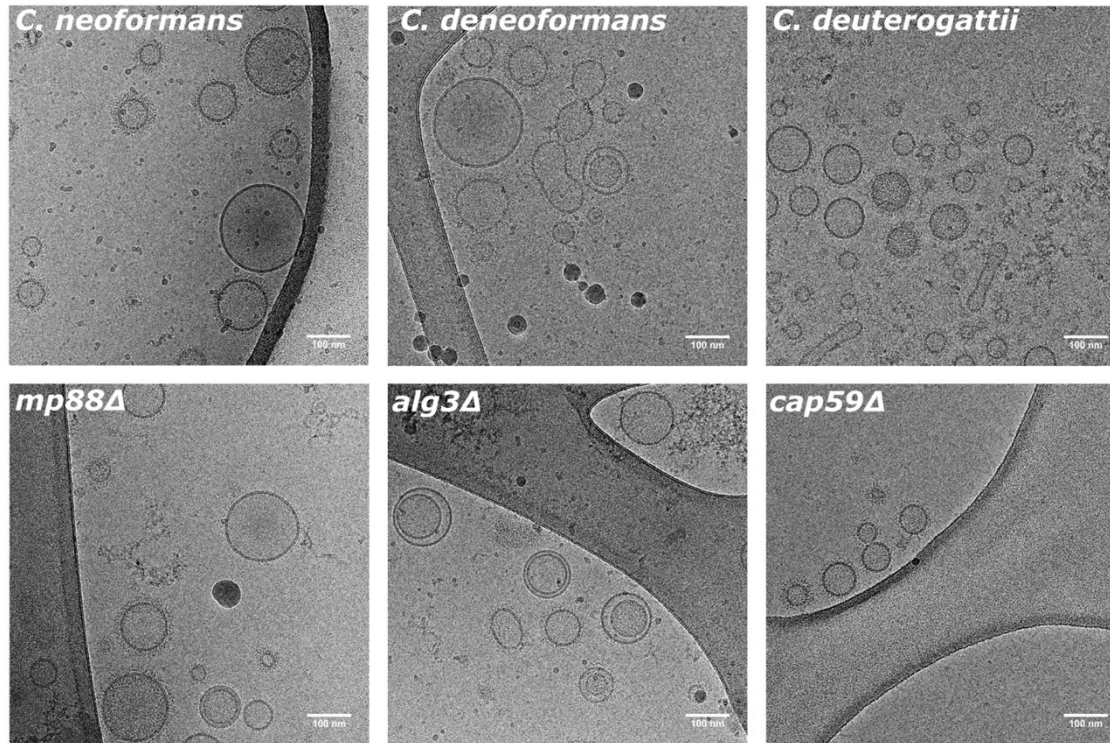

**Figure S2.** Representative cryo-EM images of EVs purified from different *Cryptococcus* strains. Scale bars represent 100 nm. The data presented in this figure have been generated using images obtained using a TECNAI F20 transmission electron microscope
